# Supplementary material for: Impacts of forest age on soil characteristics and fertility quality of Populus simonii shelter forest at the southern edge of the Horqin Sandy Land, China
Source: PeerJ journal article supplement (doi:10.7717/peerj.17512), 2024-05-31
Supplement: Source_files.xls [file Source_files.xls]

## Sheet: Tree height
Tree height in shelter forests of different forest ages
No.	Young forest			Middle-aged forest			Near-mature forest			Mature forest			Over-mature forest
1	7.6	8.1	7.3	9.8	9.7	9.6	11.5	10.7	11.2	15.2	14.8	14.3	16.2	16.5	15.7
2	7.7	8.3	7.7	10.1	9.6	9.6	11.2	11.7	11.4	14.2	13.9	14.6	17.2	17.4	16.2
3	8.2	7.6	7.8	9.7	9.9	9.8	12.4	10.4	12.2	13.7	13.6	14.1	15.9	17.3	15.9
4	8.5	7.8	7.4	9.6	10.3	8.7	10.9	11.9	11.2	13.9	13.5	14.1	15.5	16.2	15.2
5	8.6	7.9	7.5	9.9	10.5	10.2	10.8	12.6	10.4	13.8	14.2	14.5	16.6	15.4	17.5
6	8	7.4	7.3	9.2	10.1	10.8	11.6	12.5	12.2	14.7	14	13.8	17.5	15.5	17
7	7.6	8.6	8.4	9.3	9.5	9.7	12.7	12.3	11.2	14.2	13.9	12.7	17.5	16.1	16.3
8	7.8	8.1	8.2	10.6	10.2	9.2	12.6	12.1	11.8	14.2	15.1	14.9	16.2	16.2	15.9
9	7.9	7.6	8.5	10.5	10.4	10.8	12.8	11.9	12.5	13.7	13.7	13.8	15.8	16	17.4
10	8.2	7.4	8.5	10.3	9.7	9.5	10.5	11.5	11.5	14.6	14.1	15.1	15.6	15.7	17
11	8.1	7.8	8.1	9.8	9.4	9.8	11.6	11.8	12.2	15.2	13.6	12.3	16.8	16.1	17.2
12	7.6	7.9	8.9	9.6	9.4	9.5	10.9	11.6	12.8	13.6	13.5	14.1	17.2	16.8	16.2
13	7.5	8.1	8.8	9.4	9.1	9.4	11.1	10.9	10.5	13.7	13.7	15.5	17	16.6	15.4
14	7.7	7.2	7.4	10.1	9.2	9.4	11.5	11.6	11.5	14.6	13.6	14.1	15.6	15.8	15.7
15	7.7	8.6	7.9	9.2	9.2	10.1	11.7	11.6	12.2	13.6	14.1	13.3	15.2	16.4	15.1
average value	7.91333	7.89333	7.98	9.80667	9.74667	9.74	11.5867	11.6733	11.6533	14.1933	13.9533	14.08	16.3867	16.2667	16.2467
	7.92889			9.76444			11.6378			14.0756			16.3
standard deviation	0.431855			0.475701			0.665762			0.629693			0.705534

## Sheet: Soil chemical properties
Soil chemical properties in shelter forests of different forest ages
Soil depth	Sample plot number	sampling point	age class	Soil ph	organic carbon	available phosphorus	available potassium	available nitrogen	total nitrogen	total phosphorus	total potassium
0-20	YF-1	y-1-1	Young forest	7.36	5.17	1.29	36.83	38.53	0.79	0.31	32.69
		y-1-2		7.29	5.83	1.35	37.68	33.96	0.78	0.32	33.69
		y-1-3		7.41	6.12	1.38	36.99	40.19	0.79	0.29	34.03
	YF-2	y-2-1		7.26	5.03	1.22	38.72	41.51	0.81	0.28	33.85
		y-2-2		7.38	4.91	1.16	40.12	40.98	0.91	0.3	32.07
		y-2-3		7.31	5.42	1.27	40.54	40.03	0.86	0.31	36.02
	YF-3	y-3-1		7.77	5.08	1.22	39.63	37.62	0.61	0.33	33.99
		y-3-2		7.42	4.33	1.21	41.15	38.12	0.65	0.28	35.01
		y-3-3		7.26	4.02	1.34	41.69	38.04	0.63	0.28	33.06
20-40	YF-1	y-1-1		7.31	4.2	0.78	33.69	31.98	0.72	0.22	31.93
		y-1-2		7.28	3.98	0.71	35.12	29.85	0.63	0.26	30.25
		y-1-3		7.33	4.68	0.66	30.96	30.69	0.74	0.25	33.96
	YF-2	y-2-1		7.32	4.83	0.72	32.83	30.68	0.69	0.26	33.02
		y-2-2		7.27	3.68	0.75	30.18	30.17	0.63	0.24	32.05
		y-2-3		7.21	4.12	0.62	30.96	31.56	0.75	0.24	31.88
	YF-3	y-3-1		7.18	4.02	0.65	34.28	30.92	0.58	0.23	32.69
		y-3-2		7.29	3.75	0.68	33.68	29.12	0.69	0.26	32.06
		y-3-3		7.28	3.97	0.79	35.01	29.76	0.66	0.25	32.17
40-60	YF-1	y-1-1		7.2	4.52	0.66	30.86	29.73	0.61	0.24	30.77
		y-1-2		7.18	3.88	0.69	31.65	30.72	0.58	0.25	32.56
		y-1-3		7.17	3.76	0.71	30.77	29.13	0.66	0.21	31.58
	YF-2	y-2-1		7.18	3.57	0.68	30.56	27.69	0.59	0.22	30.65
		y-2-2		7.26	3.69	0.69	29.73	29.15	0.61	0.26	31.79
		y-2-3		7.17	4.42	0.63	30.15	28.63	0.64	0.21	33.06
	YF-3	y-3-1		7.22	3.68	0.62	30.44	28.58	0.55	0.24	32.13
		y-3-2		7.3	3.61	0.72	30.12	27.55	0.68	0.26	31.21
		y-3-3		7.11	3.74	0.66	30.18	26.74	0.64	0.21	31.42
0-20	MAF-1	m-1-1	Middle-aged forest	7.26	6.68	1.21	59.62	55.28	0.81	0.38	36.93
		m-1-2		7.33	5.42	1.38	59.48	54.62	0.86	0.36	38.23
		m-1-3		7.32	4.87	1.39	60.12	53.77	0.79	0.35	34.55
	MAF-2	m-2-1		7.36	4.89	1.52	57.63	52.18	0.91	0.37	39.12
		m-2-2		7.42	5.36	1.54	56.99	54.16	0.88	0.35	35.28
		m-2-3		7.45	5.69	1.49	57.52	51.98	0.85	0.33	33.98
	MAF-3	m-3-1		7.22	5.82	1.52	60.78	53.02	0.78	0.38	38.38
		m-3-2		7.36	5.66	1.57	58.63	52.45	0.83	0.37	36.21
		m-3-3		7.39	6.29	1.68	56.11	50.27	0.91	0.38	37.62
20-40	MAF-1	m-1-1		7.18	5.32	0.72	39.82	41.73	0.72	0.31	34.26
		m-1-2		7.28	4.91	0.91	38.73	44.95	0.66	0.33	33.62
		m-1-3		7.29	4.76	0.88	39.62	47.88	0.75	0.3	32.68
	MAF-2	m-2-1		7.19	5.12	0.96	42.63	43.36	0.82	0.31	36.45
		m-2-2		7.31	4.48	0.92	41.58	46.98	0.88	0.28	32.18
		m-2-3		7.3	4.37	0.83	43.11	41.89	0.81	0.32	34.88
	MAF-3	m-3-1		7.18	5.75	0.82	40.78	43.51	0.77	0.33	36.98
		m-3-2		7.26	4.51	0.96	43.43	45.93	0.69	0.29	33.45
		m-3-3		7.29	4.88	0.78	36.42	43.12	0.62	0.3	34.28
40-60	MAF-1	m-1-1		7.15	4.55	0.88	34.57	40.73	0.76	0.29	33.75
		m-1-2		7.23	4.13	0.69	32.62	44.55	0.69	0.27	34.69
		m-1-3		7.22	3.99	0.83	31.57	46.01	0.71	0.23	35.72
	MAF-2	m-2-1		7.18	4.97	0.72	31.99	43.36	0.62	0.3	32.69
		m-2-2		7.3	5.02	0.76	34.62	45.68	0.59	0.28	34.87
		m-2-3		7.14	4.23	0.85	34.68	41.18	0.64	0.28	33.55
	MAF-3	m-3-1		7.13	4.53	0.71	33.56	43.51	0.69	0.29	32.96
		m-3-2		7.21	4.62	0.79	34.96	45.43	0.77	0.25	35.16
		m-3-3		7.19	4.75	0.88	35.78	43.12	0.62	0.27	30.88
0-20	NMF-1	n-1-1	Near-mature forest	7.26	8.63	2.21	53.35	59.62	1.13	0.47	37.62
		n-1-2		7.39	9.01	2.22	56.72	57.19	1.18	0.41	39.75
		n-1-3		7.29	8.88	2.08	54.11	59.78	1.16	0.46	36.88
	NMF-2	n-2-1		7.41	9.01	1.96	63.58	60.69	0.89	0.46	38.88
		n-2-2		7.22	8.98	2.07	62.28	60.88	0.85	0.44	37.43
		n-2-3		7.27	8.17	1.93	64.98	58.74	0.98	0.42	36.82
	NMF-3	n-3-1		7.32	8.83	1.92	59.72	59.85	0.96	0.42	38.69
		n-3-2		7.32	8.96	1.95	62.98	57.16	0.97	0.46	39.02
		n-3-3		7.29	8.61	2.09	64.11	60.01	1.15	0.48	38.69
20-40	NMF-1	n-1-1		7.21	8.09	1.38	59.63	52.62	0.98	0.41	35.71
		n-1-2		7.29	7.88	1.44	58.91	52.11	0.91	0.38	36.52
		n-1-3		7.18	7.72	1.54	54.56	50.02	0.96	0.39	34.69
	NMF-2	n-2-1		7.17	7.33	1.43	56.14	50.17	0.99	0.44	36.11
		n-2-2		7.26	7.89	1.65	60.78	51.03	0.86	0.37	37.06
		n-2-3		7.16	7.63	1.44	59.13	49.28	0.83	0.36	37.08
	NMF-3	n-3-1		7.26	7.54	1.61	52.17	49.87	0.95	0.39	35.69
		n-3-2		7.15	7.21	1.41	54.06	50.66	0.91	0.41	36.89
		n-3-3		7.32	7.77	1.45	55.88	50.38	1.13	0.42	36.99
40-60	NMF-1	n-1-1		7.17	7.21	1.33	52.73	49.22	0.88	0.36	34.21
		n-1-2		7.23	7.18	1.42	49.62	50.13	0.84	0.32	36.09
		n-1-3		7.11	6.66	1.46	49.71	47.23	0.98	0.38	35.75
	NMF-2	n-2-1		7.09	7.01	1.32	55.98	49.54	0.69	0.35	34.69
		n-2-2		7.15	6.83	1.29	54.12	47.56	0.86	0.33	33.62
		n-2-3		7.17	6.85	1.27	56.62	49.51	0.89	0.38	33.89
	NMF-3	n-3-1		7.03	7.81	1.36	56.77	50.77	0.94	0.36	33.62
		n-3-2		7.09	6.89	1.24	56.93	48.86	0.85	0.38	34.25
		n-3-3		7.15	6.46	1.27	57.78	48.65	0.87	0.37	35.06
0-20	MF-1	M-1-1	Mature forest	7.36	7.69	1.62	52.57	49.13	0.99	0.44	35.21
		M-1-2		7.29	6.83	1.78	51.62	47.63	0.93	0.39	36.91
		M-1-3		7.21	6.99	1.65	51.38	44.89	1.03	0.45	36.21
	MF-2	M-2-1		7.41	7.37	1.53	48.37	48.12	0.92	0.44	34.89
		M-2-2		7.18	7.89	1.68	47.72	47.02	0.84	0.45	35.88
		M-2-3		7.17	8.04	1.55	48.62	45.11	0.77	0.38	35.63
	MF-3	M-3-1		7.22	7.16	1.71	52.89	47.03	0.95	0.43	35.85
		M-3-2		7.32	7.31	1.66	48.77	45.53	0.87	0.46	34.21
		M-3-3		7.29	7.02	1.59	47.15	48.62	1.06	0.39	35.69
20-40	MF-1	M-1-1		7.18	6.79	0.89	42.11	36.89	0.81	0.38	34.51
		M-1-2		7.15	6.87	0.97	43.52	34.12	0.83	0.39	31.28
		M-1-3		7.18	6.99	0.92	45.89	34.69	0.92	0.4	32.96
	MF-2	M-2-1		7.17	6.67	0.79	43.22	35.02	0.87	0.41	33.96
		M-2-2		7.03	6.01	0.88	41.52	34.78	0.81	0.35	31.25
		M-2-3		7.09	6.72	0.91	41.07	36.12	0.89	0.38	34.05
	MF-3	M-3-1		7.22	6.36	1.13	41.77	34.96	0.82	0.33	33.96
		M-3-2		7.23	6.78	0.96	40.52	34.45	0.88	0.38	32.78
		M-3-3		7.29	6.32	0.94	41.89	34.13	0.82	0.39	33.69
40-60	MF-1	M-1-1		7.11	5.89	0.88	40.88	34.11	0.72	0.33	32.89
		M-1-2		7.09	6.13	0.75	42.59	33.69	0.86	0.35	33.65
		M-1-3		7.22	6.26	0.81	43.17	33.55	0.81	0.33	32.58
	MF-2	M-2-1		7.03	6.01	0.81	38.55	34.98	0.71	0.32	31.56
		M-2-2		7.09	5.93	0.86	39.17	34.62	0.68	0.38	32.63
		M-2-3		7.19	5.95	0.8	38.38	33.16	0.74	0.31	33.77
	MF-3	M-3-1		7.23	6.11	0.77	43.52	35.01	0.67	0.34	30.59
		M-3-2		7.07	6.35	0.76	41.02	34.21	0.72	0.29	33.64
		M-3-3		7.06	6.41	0.89	42.56	33.69	0.66	0.34	33.02
0-20	OMF-1	o-1-1	Over-mature forest	7.22	6.31	1.82	46.73	46.72	0.96	0.38	35.21
		o-1-2		7.32	5.62	1.64	45.62	45.73	0.91	0.42	34.98
		o-1-3		7.24	5.75	1.65	47.02	45.64	0.83	0.39	36.22
	OMF-2	o-2-1		7.33	6.22	1.42	44.59	43.62	0.82	0.38	36.35
		o-2-2		7.25	5.85	1.43	43.58	44.89	0.79	0.36	32.69
		o-2-3		7.31	6.58	1.48	42.19	43.12	0.87	0.39	33.12
	OMF-3	o-3-1		7.22	5.87	1.32	44.15	41.96	0.95	0.42	31.62
		o-3-2		7.28	5.67	1.39	43.17	43.72	0.85	0.41	36.52
		o-3-3		7.09	6.29	1.31	44.05	42.18	0.98	0.38	35.98
20-40	OMF-1	o-1-1		7.19	5.78	0.93	40.17	36.21	0.91	0.33	32.96
		o-1-2		7.09	6	0.82	42.07	33.38	0.85	0.35	33.65
		o-1-3		7.17	5.89	0.88	40.55	33.56	0.81	0.32	34.72
	OMF-2	o-2-1		7.23	5.43	0.86	38.19	36.08	0.77	0.34	32.69
		o-2-2		7.03	5.21	0.89	39.17	33.69	0.76	0.31	32.64
		o-2-3		7.15	5.13	0.96	38.62	32.99	0.71	0.36	31.26
	OMF-3	o-3-1		7.16	5.86	0.95	38.38	34.55	0.84	0.33	33.66
		o-3-2		7.14	5.45	0.87	42.69	34.68	0.76	0.35	33.25
		o-3-3		7.16	5.54	0.81	41.11	35.98	0.77	0.34	31.74
40-60	OMF-1	o-1-1		7.09	4.41	0.77	39.83	33.12	0.77	0.32	32.01
		o-1-2		7.11	5.09	0.69	41.05	36.08	0.81	0.29	33.03
		o-1-3		7.1	5.11	0.63	40.62	33.85	0.72	0.27	31.85
	OMF-2	o-2-1		7.03	4.89	0.72	37.62	34.89	0.75	0.29	31.25
		o-2-2		7.14	4.64	0.75	36.83	34.36	0.79	0.32	30.96
		o-2-3		7.06	4.89	0.64	36.99	33.12	0.77	0.26	33.47
	OMF-3	o-3-1		7.03	5.21	0.53	38.96	33.17	0.69	0.28	33.21
		o-3-2		7.12	4.89	0.79	38.01	34.55	0.72	0.3	32.01
		o-3-3		7.11	5.03	0.78	37.69	33.38	0.7	0.34	31.86

## Sheet: Physical Properties
Soil Physical Properties in shelter forests of different forest ages
Soil depth	Sample plot number	sampling point	age class	water content	Bulk density	non-capillary porosity	capillary porosity	total porosity	field water holding capacity
0-20	YF-1	y-1-1	Young forest	4.66	1.63	2.81	26.26	29.07	24
		y-1-2		4.98	1.67	2.66	24.82	27.48	24.51
		y-1-3		4.84	1.55	3.21	25.99	29.2	25.69
	YF-2	y-2-1		4.78	1.58	2.41	25.96	28.37	25.31
		y-2-2		4.83	1.48	2.12	25.44	27.56	24.62
		y-2-3		4.49	1.44	2.62	25.36	27.98	23.11
	YF-3	y-3-1		4.33	1.48	2.33	27.13	29.46	25.98
		y-3-2		4.38	1.65	2.46	26.86	29.32	24.87
		y-3-3		4.96	1.72	2.21	27.03	29.24	25.66
20-40	YF-1	y-1-1		5.81	1.62	2.02	25.26	27.28	24.89
		y-1-2		6.47	1.53	1.89	24.82	26.71	22.61
		y-1-3		6.62	1.71	2.56	23.99	26.55	22.89
	YF-2	y-2-1		6.4	1.78	2.18	25.96	28.14	24.56
		y-2-2		6.58	1.75	2.43	24.44	26.87	24.44
		y-2-3		6.21	1.69	2.37	24.36	26.73	26.71
	YF-3	y-3-1		5.93	1.66	2.09	26.13	28.22	25.1
		y-3-2		5.71	1.68	1.91	25.86	27.77	23.44
		y-3-3		5.99	1.71	2.21	26.03	28.24	23.26
40-60	YF-1	y-1-1		7.83	1.87	1.76	26.21	27.97	24.62
		y-1-2		8.11	1.77	1.62	25.31	26.93	23.87
		y-1-3		8.26	1.69	1.88	24.62	26.5	22.98
	YF-2	y-2-1		7.55	1.62	2.03	25.65	27.68	23.98
		y-2-2		7.09	1.74	1.59	25.89	27.48	24.12
		y-2-3		7.11	1.63	1.62	24.56	26.18	24.36
	YF-3	y-3-1		7.24	1.73	2.14	25.36	27.5	23.18
		y-3-2		7.16	1.68	1.87	23.57	25.44	23.65
		y-3-3		7.12	1.82	1.59	24.14	25.73	23.99
0-20	MAF-1	m-1-1	Middle-aged forest	5.18	1.38	3.69	27.53	31.22	26.13
		m-1-2		5.03	1.44	3.12	26.21	29.33	26.58
		m-1-3		4.81	1.49	2.98	25.63	28.61	25.11
	MAF-2	m-2-1		5.32	1.31	3.56	26.88	30.44	25.38
		m-2-2		5.21	1.46	3.16	26.97	30.13	24.68
		m-2-3		5.59	1.51	3.88	27.25	31.13	26.75
	MAF-3	m-3-1		5.74	1.52	3.75	27.62	31.37	26.78
		m-3-2		5.59	1.54	3.12	26.53	29.65	24.99
		m-3-3		5.51	1.45	3.77	28.01	31.78	26.38
20-40	MAF-1	m-1-1		7.52	1.67	2.88	27.62	30.5	24.89
		m-1-2		7.08	1.65	2.62	26.43	29.05	23.56
		m-1-3		7.18	1.53	3.06	26.55	29.61	25.12
	MAF-2	m-2-1		7.31	1.56	3.02	27.61	30.63	25.47
		m-2-2		7.04	1.49	2.54	26.37	28.91	24.38
		m-2-3		7.18	1.38	2.77	27.62	30.39	24.66
	MAF-3	m-3-1		7.47	1.44	2.89	26.56	29.45	25.81
		m-3-2		7.62	1.59	2.79	25.03	27.82	25
		m-3-3		7.14	1.71	3.73	24.48	28.21	27.12
40-60	MAF-1	m-1-1		8.66	1.75	2.13	26.33	28.46	24.58
		m-1-2		8.49	1.77	2.58	25.12	27.7	25.91
		m-1-3		8.62	1.62	2.2	25.89	28.09	23.88
	MAF-2	m-2-1		8.78	1.68	1.86	25.89	27.75	24.98
		m-2-2		8.61	1.58	2.36	25.62	27.98	25.67
		m-2-3		8.66	1.62	1.91	26.58	28.49	25.32
	MAF-3	m-3-1		8.43	1.69	2.29	26.42	28.71	24.65
		m-3-2		8.63	1.55	2.03	26.12	28.15	24.89
		m-3-3		8.55	1.43	2.11	24.71	26.82	24.92
0-20	NMF-1	n-1-1	Near-mature forest	6.68	1.26	5.17	29.83	35	27.88
		n-1-2		6.91	1.46	4.68	30.62	35.3	28.01
		n-1-3		6.84	1.33	5.63	28.58	34.21	26.94
	NMF-2	n-2-1		6.59	1.44	5.83	29.66	35.49	28.36
		n-2-2		6.43	1.28	5.87	30.55	36.42	27.91
		n-2-3		6.21	1.19	4.77	29.01	33.78	27.04
	NMF-3	n-3-1		6.41	1.39	4.89	30.96	35.85	28.48
		n-3-2		6.81	1.47	5.15	30.25	35.4	27.72
		n-3-3		6.96	1.29	5.77	29.01	34.78	27.95
20-40	NMF-1	n-1-1		7.68	1.57	4.87	29.33	34.2	27.21
		n-1-2		7.99	1.41	5.21	28.58	33.79	27.03
		n-1-3		7.93	1.52	4.99	29.81	34.8	26.88
	NMF-2	n-2-1		7.49	1.38	4.26	29.53	33.79	26.21
		n-2-2		7.61	1.49	5.11	28.62	33.73	26.34
		n-2-3		7.77	1.36	4.67	29.77	34.44	26.55
	NMF-3	n-3-1		7.89	1.46	4.87	27.62	32.49	27.56
		n-3-2		8.03	1.37	5.23	27.41	32.64	27.14
		n-3-3		7.81	1.54	4.61	28.66	33.27	27.09
40-60	NMF-1	n-1-1		9.11	1.42	3.96	28.33	32.29	27.01
		n-1-2		9.07	1.39	4.21	29.63	33.84	26.32
		n-1-3		9.01	1.48	3.96	28.51	32.47	25.89
	NMF-2	n-2-1		9.41	1.63	3.65	28.45	32.1	25.67
		n-2-2		9.34	1.58	4.31	27.61	31.92	26.89
		n-2-3		9.23	1.57	4.11	27.96	32.07	26.43
	NMF-3	n-3-1		9.32	1.56	3.89	28.16	32.05	26.74
		n-3-2		9.56	1.46	3.78	27.62	31.4	26.11
		n-3-3		9.34	1.67	3.68	28.02	31.7	25.89
0-20	MF-1	M-1-1	Mature forest	6.45	1.33	4.98	28.02	33	26.89
		M-1-2		6.31	1.37	5.11	26.02	31.13	26.31
		M-1-3		6.4	1.45	4.89	29.33	34.22	26.21
	MF-2	M-2-1		6.02	1.38	4.76	28.96	33.72	25.78
		M-2-2		6.25	1.48	5.12	27.56	32.68	27.16
		M-2-3		6.12	1.34	5.11	29.13	34.24	26.91
	MF-3	M-3-1		5.78	1.38	5.06	28.62	33.68	26.85
		M-3-2		5.86	1.35	4.65	27.56	32.21	25.63
		M-3-3		5.69	1.42	4.77	27.41	32.18	27.04
20-40	MF-1	M-1-1		7.56	1.42	4.56	27.55	32.11	25.75
		M-1-2		7.51	1.53	3.96	28.22	32.18	25.83
		M-1-3		7.36	1.41	3.99	28.37	32.36	26.31
	MF-2	M-2-1		7.69	1.48	4.12	27.1	31.22	26.14
		M-2-2		7.54	1.55	4.01	27.65	31.66	26.49
		M-2-3		7.65	1.49	3.87	26.53	30.4	25.81
	MF-3	M-3-1		7.99	1.56	3.63	26.88	30.51	25.93
		M-3-2		7.69	1.58	4.58	26.62	31.2	25.62
		M-3-3		7.82	1.51	4.21	27.62	31.83	26.48
40-60	MF-1	M-1-1		8.91	1.67	4.31	27.12	31.43	25.22
		M-1-2		8.45	1.61	4.02	28.5	32.52	27.19
		M-1-3		8.67	1.49	3.98	28.11	32.09	25.87
	MF-2	M-2-1		9.08	1.42	3.42	26.62	30.04	25.38
		M-2-2		9.26	1.54	4	26.82	30.82	24.34
		M-2-3		8.85	1.43	4.12	26.58	30.7	23.99
	MF-3	M-3-1		8.68	1.63	4.08	26.73	30.81	25.64
		M-3-2		8.93	1.58	3.62	26.95	30.57	25.81
		M-3-3		8.61	1.62	4.17	26.22	30.39	26.87
0-20	OMF-1	o-1-1	Over-mature forest	5.02	1.39	4.58	27.21	31.79	25.51
		o-1-2		5.15	1.57	4.62	28.16	32.78	26.89
		o-1-3		4.86	1.33	3.99	27.89	31.88	27.01
	OMF-2	o-2-1		5.31	1.56	4.62	27.36	31.98	27.62
		o-2-2		5.12	1.34	3.65	26.99	30.64	25.36
		o-2-3		5.38	1.51	4.89	28.03	32.92	24.17
	OMF-3	o-3-1		4.67	1.37	4.44	27.33	31.77	25.16
		o-3-2		4.89	1.28	4.25	27.06	31.31	24.17
		o-3-3		4.93	1.41	4.98	25.83	30.81	24.08
20-40	OMF-1	o-1-1		6.89	1.56	2.98	27.32	30.3	25.18
		o-1-2		6.78	1.71	3.44	26.35	29.79	25.69
		o-1-3		6.98	1.53	4.01	27.69	31.7	24.31
	OMF-2	o-2-1		7.12	1.61	3.86	27.12	30.98	24.96
		o-2-2		7.03	1.56	3.12	26.8	29.92	24.46
		o-2-3		7.13	1.47	4.02	27.02	31.04	25.68
	OMF-3	o-3-1		7.36	1.47	4.28	27.89	32.17	25.89
		o-3-2		7.09	1.43	4.19	26.13	30.32	23.96
		o-3-3		7.26	1.45	3.7	25.17	28.87	26.12
40-60	OMF-1	o-1-1		8.23	1.68	3.21	26.82	30.03	23.98
		o-1-2		8.05	1.56	2.89	25.99	28.88	24.62
		o-1-3		7.96	1.52	3.15	26.43	29.58	24.51
	OMF-2	o-2-1		8.27	1.71	3.69	26.88	30.57	24.81
		o-2-2		8.18	1.53	3.08	27.26	30.34	24.69
		o-2-3		7.89	1.67	3.12	24.56	27.68	26.31
	OMF-3	o-3-1		7.72	1.59	3	26.89	29.89	25.01
		o-3-2		7.85	1.57	3.33	26.81	30.14	25.82
		o-3-3		7.64	1.51	3.21	26.33	29.54	23.66

## Sheet: Fertility assessment
Norm calculation for soil indicators								SQI of soil indicators for all soil depths at different age classes						SQI for different soil depths of the same age class
Soil characteristics	PC-1	PC-2	calculation process			Norm		TDS-SQI	YF	0.36	0.387	0.39				0-20	20-40	40-60
Bulk density	-0.869	0.068	7.53877	0.0096133	7.54839	2.74743			MAF	0.46	0.47	0.5		TDS-SQI	YF	0.58	0.33	0.28
non-capillary porosity	0.908	0.254	8.23062	0.134129	8.36475	2.89219			NMF	0.54	0.5	0.5			MAF	0.66	0.48	0.39
capillary porosity	0.913	0.232	8.32152	0.1119	8.43342	2.90404			MF	0.45	0.48	0.47			NMF	0.78	0.52	0.46
total porosity	0.945	0.251	8.91507	0.130979	9.04605	3.00766			OMF	0.42	0.45	0.46			MF	0.64	0.45	0.36
water content	-0.155	0.882	0.239842	1.6173	1.85715	1.36277		MDS-SQI	YF	0.38	0.39	0.34			OMF	0.62	0.44	0.35
field capacity	0.898	0.163	8.05033	0.055237	8.10557	2.84703			MAF	0.45	0.46	0.5		MDS-SQI	YF	0.51	0.36	0.28
total nitrogen	0.895	0.009	7.99663	0.000168399	7.9968	2.82786			NMF	0.51	0.5	0.49			MAF	0.67	0.45	0.38
total phosphorus	0.954	0.074	9.08569	0.0113846	9.09707	3.01614			MF	0.42	0.45	0.49			NMF	0.77	0.47	0.42
total potassium	0.886	-0.28	7.83662	0.162994	7.99961	2.82836			OMF	0.42	0.42	0.47			MF	0.6	0.42	0.37
organic carbon	0.936	0.246	8.74607	0.125813	8.87188	2.97857									OMF	0.55	0.4	0.36
available nitrogen	0.854	-0.183	7.28076	0.0696236	7.35039	2.71116
available phosphorus	0.92	-0.306	8.44961	0.194669	8.64428	2.94012
available potassium	0.913	-0.017	8.32152	0.000600831	8.32212	2.88481
ph	0.26	-0.904	0.674851	1.69899	2.37384	1.54073
Pearson correlation between soil indicators
	organic carbon	available phosphorus	available potassium	available nitrogen	total nitrogen	Bulk density	non-capillary porosity	capillary porosity	total porosity	water content	field capacity	total phosphorus	total potassium	ph
organic carbon	1
available phosphorus	0.767	1
available potassium	0.796	0.806	1
available nitrogen	0.685	0.824	0.853	1
total nitrogen	0.766	0.766	0.706	0.654	1
Bulk density	-0.65	-0.672	-0.646	-0.613	-0.653	1
non-capillary porosity	0.894	0.711	0.734	0.589	0.748	-0.677	1
capillary porosity	0.827	0.684	0.748	0.645	0.667	-0.523	0.756	1
total porosity	0.912	0.741	0.791	0.662	0.748	-0.657	0.916	0.955	1
water content	0.056	-0.384	-0.1	-0.133	-0.162	0.244	-0.016	0.064	0.032	1
field capacity	0.772	0.631	0.697	0.653	0.599	-0.463	0.715	0.686	0.744	0.038	1
total phosphorus	0.864	0.586	0.785	0.679	0.796	-0.724	0.888	0.768	0.873	-0.15	0.679	1
total potassium	0.644	0.76	0.743	0.806	0.623	-0.553	0.572	0.595	0.624	-0.233	0.603	0.625	1
ph	0.048	0.414	0.194	0.329	0.138	-0.19	0.01	0.056	0.034	-0.529	0.096	0.143	0.338	1
